# Supplementary material
Source: publisher figshare collection journal article supplement (https://adisjournals.figshare.com/articles/dataset/_/14054621)
Supplement: Supplementary file 1 [file 1]

# Treatment Satisfaction of Galcanezumab in Japanese Patients with Episodic Migraine: A Phase 2 Randomized Controlled Study

Tatsuoka, Y., Takeshima, T., Ozeki, A., Matsumura, T. Neurol Ther (2021) DOI: 10.1007/s40120-021-00236-5

## Why did we do this study?

- A migraine causes severe throbbing pain usually on one side of the head. Migraine attacks can last for hours or days
- Currently, the level of satisfaction with preventive treatments for migraine in Japanese people is unknown
- Galcanezumab is an approved treatment for preventing migraine attacks
- In the CGAN study, galcanezumab reduced the number of days people experienced a migraine or severe headache by an average of 2.8-3.0 days each month compared with a placebo (inert injection)
- In this analysis of the CGAN study, we looked at how satisfied people were with galcanezumab treatment for preventing migraine attacks

## What did we do?

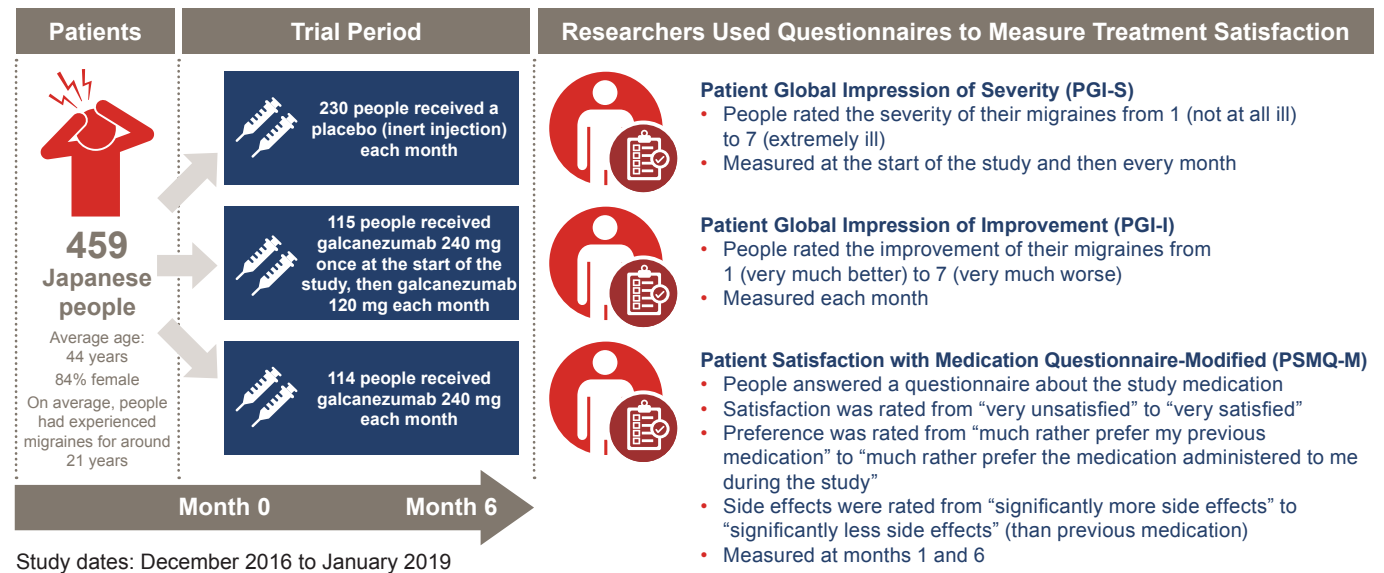

## What were the results of this study?

People who received galcanezumab:

- Had less severe migraines (PGI-S)
- Had greater improvement in their migraine disease (PGI-I)
- Were somewhat or very satisfied with galcanezumab at months 1 and 6
- Preferred or much preferred galcanezumab at months 1 and 6

Similar percentages of patients across all groups reported fewer side effects compared with their previous migraine treatment

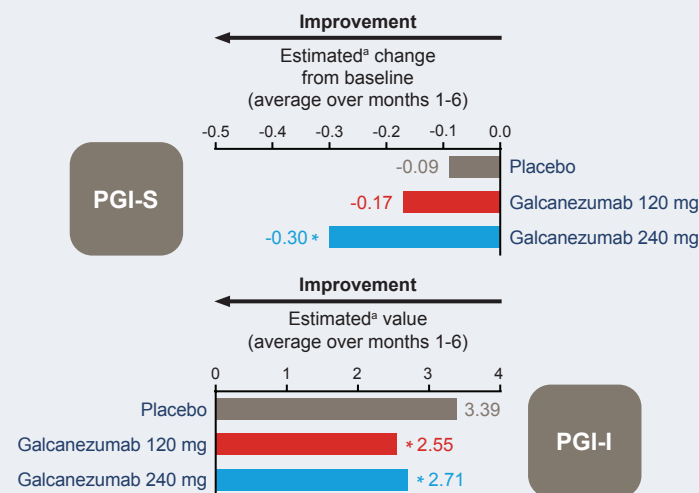

## Percentage of patients who gave positive responses<sup>b</sup> at month 1

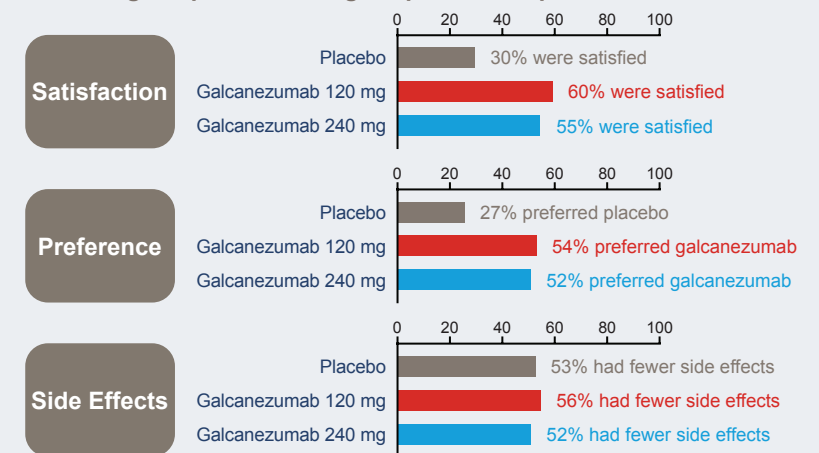

<sup>b</sup>Positive responses: somewhat or very satisfied, preferred or much preferred the study medicine, less or significantly less side effects
